# Supplementary material for: Bioactive calcium silicate extracts regulate the morphology and stemness of human embryonic stem cells at the initial stage
Source: Royal Society of Chemistry journal article supplement (doi:10.1039/c6ra17785a), 2016-01-01
Supplement: c6ra17785a1.pdf [file c6ra17785a1.pdf]

## Supporting Information

### Bioactive calcium silicate extracts regulate the morphology and stemness of human embryonic stem cells at initial stage

Fan Zhang<sup>a,b,c†</sup>, Dongyuan Lü<sup>a,b,c†</sup>, Haiyan Li<sup>d</sup>, Chunhua Luo<sup>a,b,c</sup>, Jiang Chang<sup>e‡</sup>, and Mian Long<sup>a,b,c‡</sup>

---

<sup>a.</sup> *Center of Biomechanics and Bioengineering, Institute of Mechanics, Chinese Academy of Sciences, Beijing 100190, China*

<sup>b.</sup> *Key Laboratory of Microgravity (National Microgravity Laboratory), Institute of Mechanics, Chinese Academy of Sciences, Beijing 100190, China.*

<sup>c.</sup> *Beijing Key Laboratory of Engineered Construction and Mechanobiology, Institute of Mechanics, Chinese Academy of Sciences, Beijing 100190, China*

<sup>d.</sup> *School of Biomedical Engineering, Shanghai Jiao Tong University, 1954 Huashan Road, Shanghai 200030, China*

<sup>e.</sup> *Biomaterials and Tissue Engineering Research Center, Shanghai Institute of Ceramics, Chinese Academy of Sciences, Shanghai 200050, China*

<sup>†</sup> Co-first authors: these authors contributed equally to this work.

<sup>‡</sup> Corresponding authors.

**Table S1. Summarized primer sequences of the target genes tested.**

| Transcript | Gene bank    | Primer Sequence                                                                       | TM (°C) |
|------------|--------------|---------------------------------------------------------------------------------------|---------|
| Oct-4      | NM_001285987 | F: 5' GAC AAC AAT GAA AAT CTT CAG GAG A 3'<br>R: 5' TTC TGG CGC CGG TTA CAG AAC CA 3' | 60      |
| Nanog      | XM_011520852 | F: 5' AGC CTC TAC TCT TCC TAC CAC C 3'<br>R: 5' TCC AAA GCA GCC TCC AAG TC 3'         | 60      |
| Bra        | XM_011536081 | F: 5' CCA GGT CCC GAA AGA TG 3'<br>R: 5' TGC CAA AGT TGC CAA TAC 3'                   | 50      |
| Foxa2      | XM_011529231 | F: 5' ACG ACT GTT TCC TGA AGG T 3'<br>R: 5' TTG AAG GCG TAG TGG TGT 3'                | 52      |
| ALP        | BC021289     | F: 5' AGC CCT TCA CTG CCA TCC TGT 3'<br>R: 5' ATT CTC TCG TTC ACC GCC CAC 3'          | 65      |
| Runx2      | AH005498     | F: 5' TCA CCT TGA CCA TAA CCG TCT 3'<br>R: 5' CGG GAC ACC TAC TCT CAT ACT 3'          | 65      |
| Actin      | XM_006715764 | F: 5' TCA CCA CCA CGG CCG AGC G 3'<br>R: 5' TCT CCT TCT GCA TCC TGT CG 3'             | 60      |

**Table S2. Summarized mild apoptosis percentages for hESC H9 cells.<sup>†</sup>**

|       | Apoptosis percentage at 1+3 day |            |
|-------|---------------------------------|------------|
|       | Negative                        | Apoptosis  |
| Con   | 99.03±0.76%                     | 0.97±1.52% |
| 1/256 | 99.01±0.84%                     | 0.99±0.84% |
| 1/64  | 98.31±1.57%                     | 1.69±1.57% |

<sup>†</sup>: All colonies were first placed in plain PSCeasy medium for one day, and then cultured in plain, 1/256, or 1/64 CS-supplemented PSCeasy medium for additional three days. TUNEL kit was used to detect, *via* confocal microscopy, the mild apoptosis cells and data were obtained from 15~17 colonies in each cases.

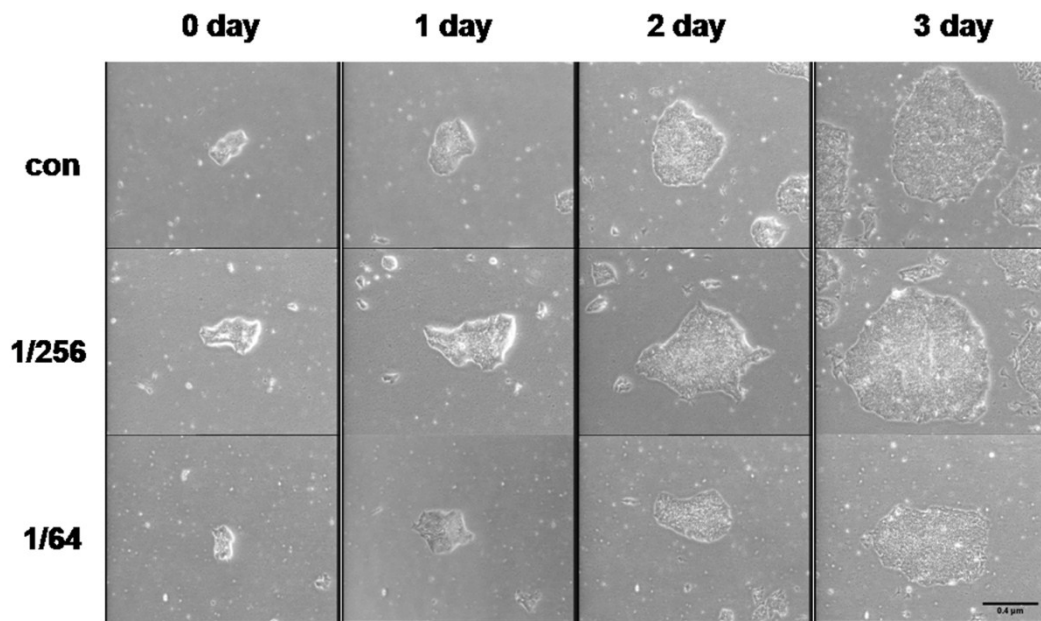

**Fig. S1** Typical optical images for hESC H9 colonies on Matrigel. All colonies were first placed in plain PSCeasy medium for one day, and then cultured in plain (*1<sup>st</sup> row*) 1/256 (*2<sup>nd</sup> row*), or 1/64 (*3<sup>rd</sup> row*) CS-supplemented PSCeasy medium for additional three days. Scale bar = 400 μm.

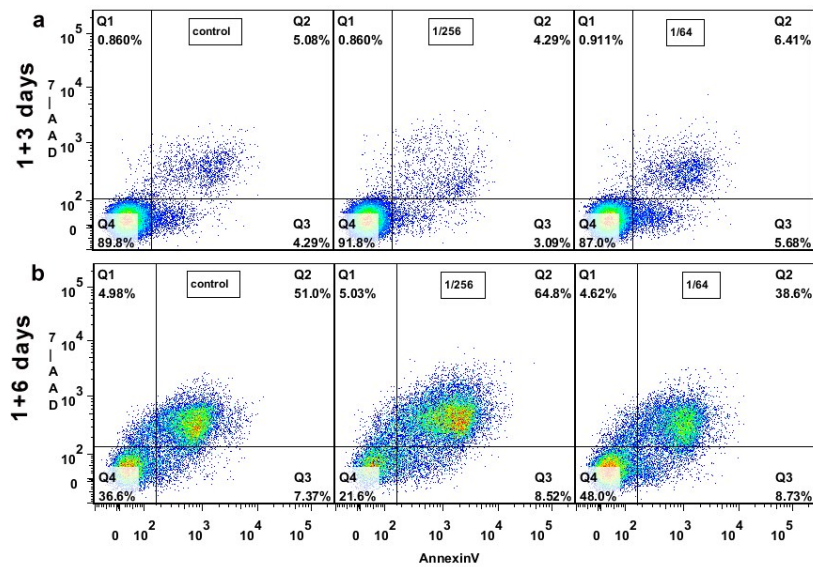

**Fig. S2** Apoptosis analysis *via* flow cytometry for hESC H9 colonies on Matrigel. All colonies were first placed in plain PSCeasy medium for one day, and then cultured in plain (*1<sup>st</sup> column*), 1/256 (*2<sup>nd</sup> column*), or 1/64 (*3<sup>rd</sup> column*) CS-supplemented PSCeasy medium for additional three (*1<sup>st</sup> row*) or six (*2<sup>nd</sup> row*) days. Each condition has nine replicates.

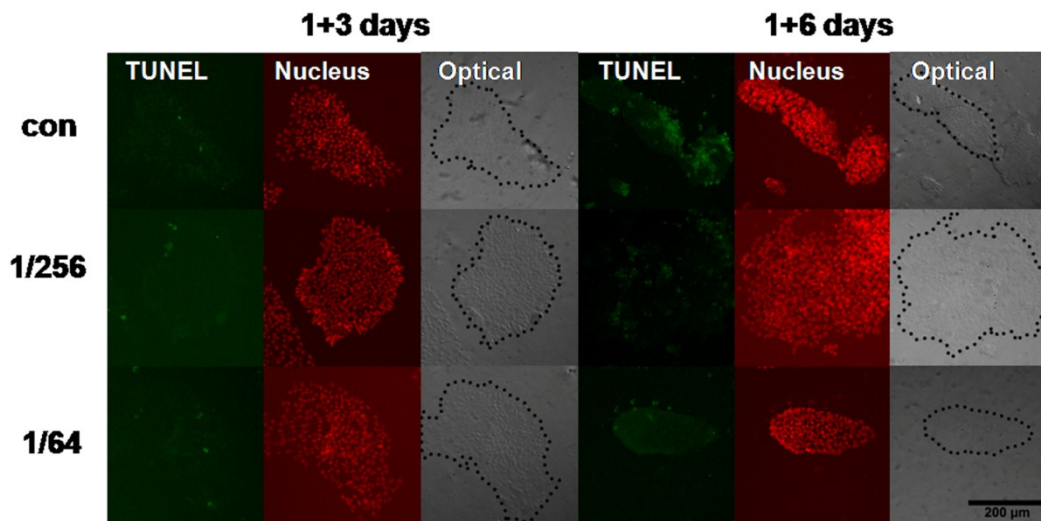

**Fig. S3** Typical apoptosis analysis *via* confocal microscopy for hESC H9 colonies on Matrigel. All colonies were first placed in plain PSCeasy medium for one day, and then cultured in plain (1<sup>st</sup> row), 1/256 (2<sup>nd</sup> row), or 1/64 (3<sup>rd</sup> row) CS-supplemented PSCeasy medium for additional three ((1+3) days; 1<sup>st</sup>-3<sup>rd</sup> columns) or six ((1+6) days; 4<sup>th</sup>-6<sup>th</sup> columns) days. Tunnel staining (1<sup>st</sup> column) was visualized under three conditions when nucleus staining (2<sup>nd</sup> column) and optical images (3<sup>rd</sup> column) serve as reference. *Black dotted lines* illustrate the contour of the colonies.

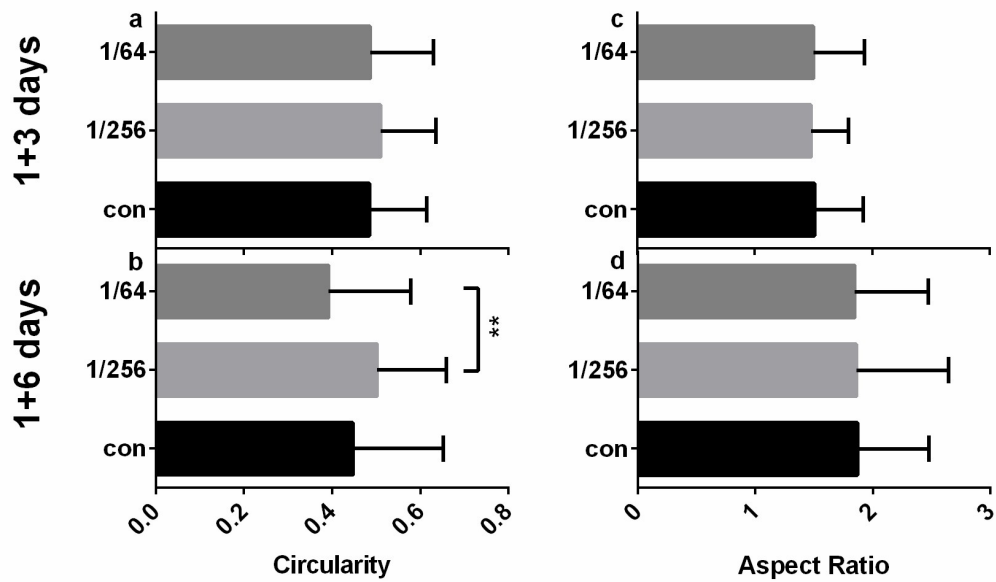

**Fig. S4** Morphological analysis of hESC H9 colonies in plain (*black bars*), 1/256 (*light grey bars*), or 1/64 (*dark grey bars*) CS-supplemented PSCeasy medium for short- (*1<sup>st</sup> row*) or long-period (*2<sup>nd</sup> row*) culture. Data are obtained from the immunostaining images in three repeated tests and presented as the mean  $\pm$ SD of colony circularity (*1<sup>st</sup> column*) and aspect ratio (*2<sup>nd</sup> column*), respectively, for totally 60 colonies.
